# Supplementary material for: Shape-switching self-assembly of new diblock copolymers with UCST-type and LCST-type segments in water
Source: Royal Society of Chemistry journal article supplement (doi:10.1039/c5py01976a), 2016-01-01
Supplement: c5py01976a1.pdf [file c5py01976a1.pdf]

## Electronic Supplementary Information

### Shape-switching self-assembly in water of new diblock copolymers with UCST-type and LCST-type segments

H. Yoshimitsu,<sup>a</sup> E. Korchagina,<sup>b</sup> A. Kanazawa,<sup>a</sup> S. Kanaoka,<sup>a</sup> F. M. Winnik<sup>\*b,c</sup> and S. Aoshima<sup>\*a</sup>

<sup>a</sup> Department of Macromolecular Science, Graduate School of Science, Osaka University,

Toyonaka, Osaka 560-0043, Japan

<sup>b</sup> Department of Chemistry, University of Montreal, CP 6128, Succursale Centre Ville, Montreal,

QC H3C 3J7, Canada

<sup>c</sup> World Premier International (WPI) Center for Materials Nanoarchitectonics (MANA), National

Institute for Materials Science (NIMS), 1-1 Namiki, Tsukuba, Ibaraki 305-0044, Japan

#### Contents:

**Fig. S1** Turbidity curves of an aqueous solution of 2.0 g/L MOVE<sub>200</sub>-*b*-([EtIm][BF<sub>4</sub>])<sub>200</sub> containing 60 mM NaBF<sub>4</sub>, scan rate: 1 °C/min.

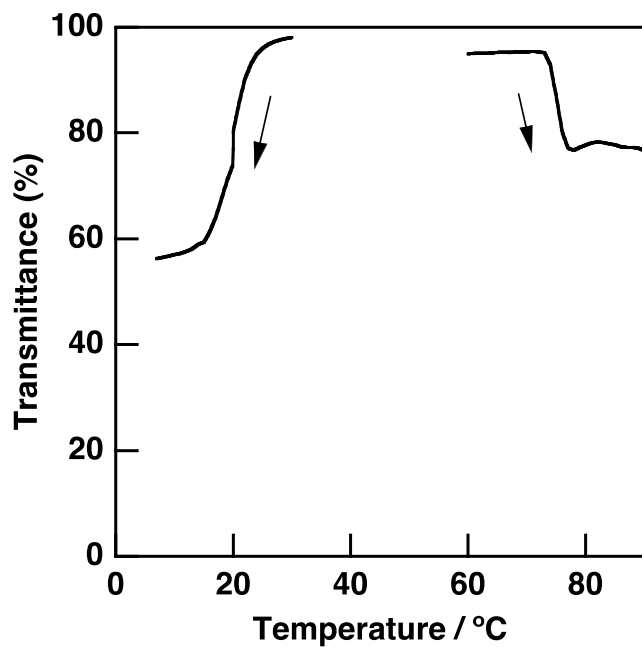

**Fig. S1** Turbidity curves of an aqueous solution of 2.0 g/L  $\text{MOVE}_{200}\text{-}b\text{-}([\text{EtIm}][\text{BF}_4])_{200}$  containing 60 mM  $\text{NaBF}_4$ , scan rate: 1 °C/min.
